# Supplementary material for: Novel Bloodless Potassium Determination Using a Signal‐Processed Single‐Lead ECG
Source: PubMed Central journal article supplement — J Am Heart Assoc. 2016 Jan 25;5(1):e002746. doi: 10.1161/JAHA.115.002746 (PMC4859394; doi:10.1161/jaha.115.002746), 2016-01-25
Supplement: JAH3-5-e002746-s002.pdf [file JAH3-5-e002746-s002.pdf]

## **Supplemental Material**

### **Video S1**

This temporal progression video demonstrates time lapse ECG changes during dialysis, together with the automated, T wave right slope and calculate ECG feature and blood potassium values. The video demonstrates how the signal processed ECG tracks with potassium changes during a dialysis run, compressing changes that occur in 216 minutes into one and a half minutes.
